# Supplementary material for: Synthesis of fluorinated polyimide towards a transparent triboelectric nanogenerator applied on screen surface
Source: Royal Society of Chemistry journal article supplement (doi:10.1039/d0ta11156b), 2021-01-01
Supplement: d0ta11156b1.pdf [file d0ta11156b1.pdf]

## Synthesis of the Fluorinated Polyimide toward the Transparent Triboelectric Nanogenerator Applied on Screen Surface

Jun Wu,<sup>a</sup> Xiaoli Wang,<sup>\*a</sup> Jiyu He,<sup>\*b</sup> Zhihao Li<sup>a</sup> and Lizhou Li<sup>a</sup>

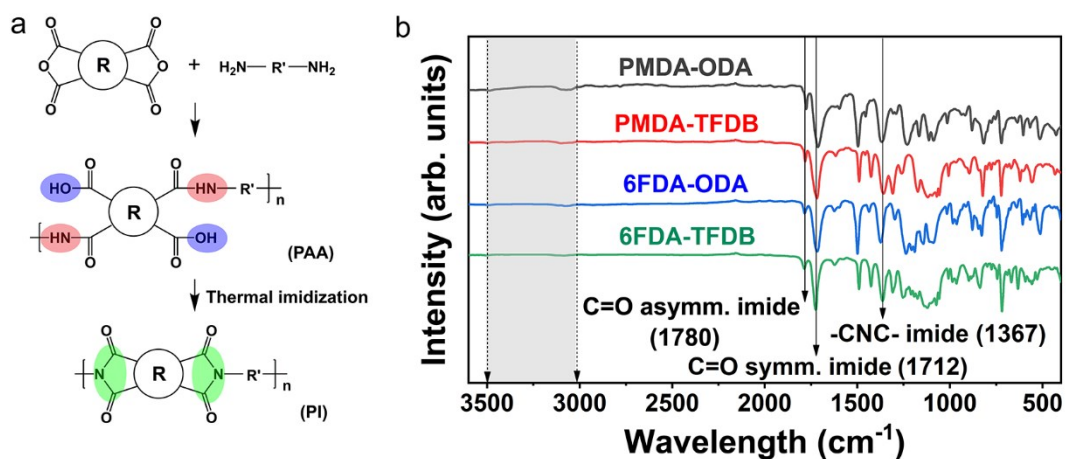

**Figure S1.** Characterization of the synthesized PIs. (a) The thermal imidization reaction of PIs. (b) The FT-IR spectra of the PIs.

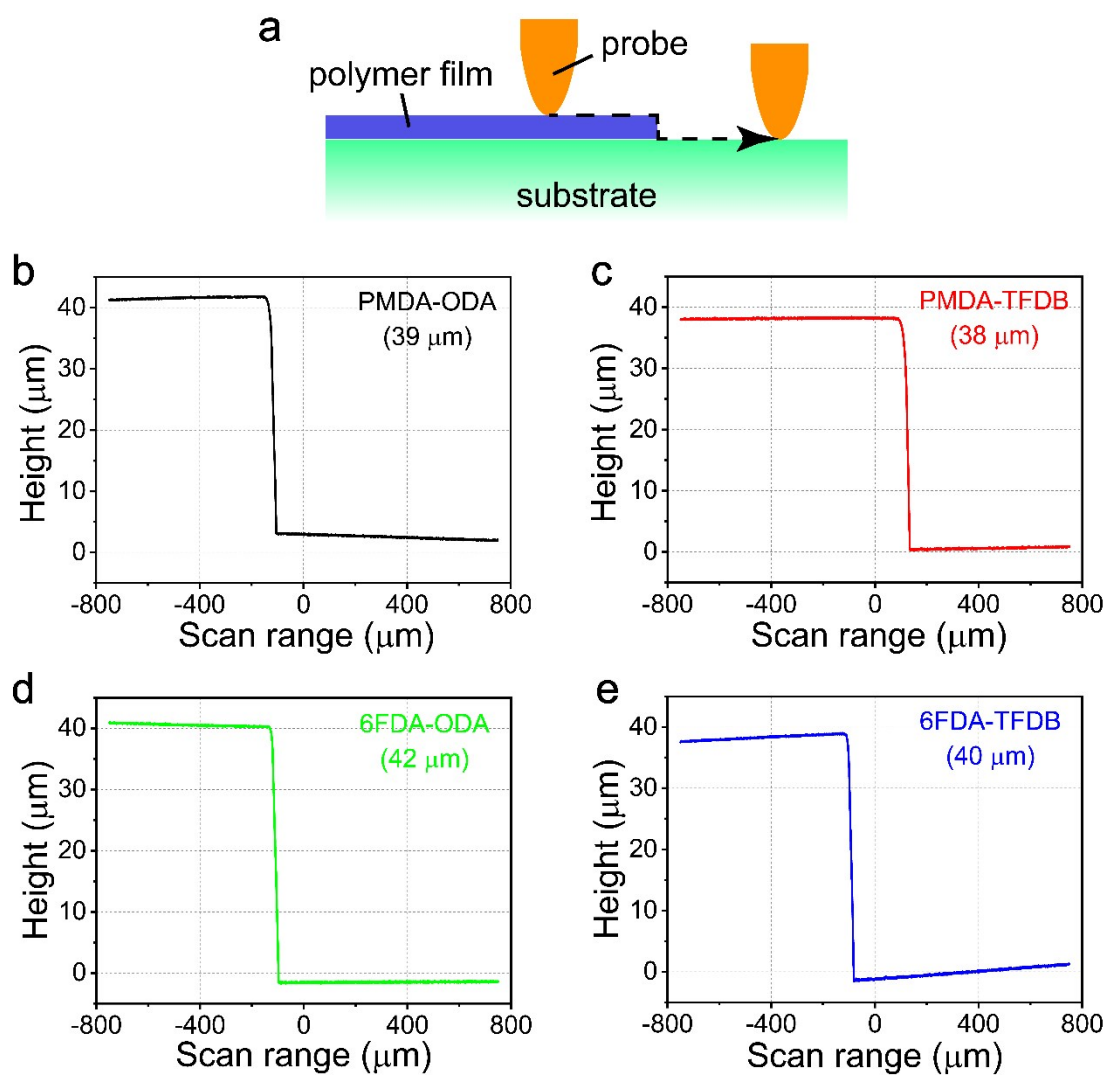

**Figure S2.** Characterization of thickness of the prepared PI films. (a) The testing principle of Nano map 3D profilometer. The probe slides across the edge between the film and substrate, and the thickness of the film can be characterized by the change in  $z$  coordinate of the probe. The tested thickness of (b) PMDA-ODA, (c) PMDA-TFDB, (d) 6FDA-ODA, (e) 6FDA-TFDB.

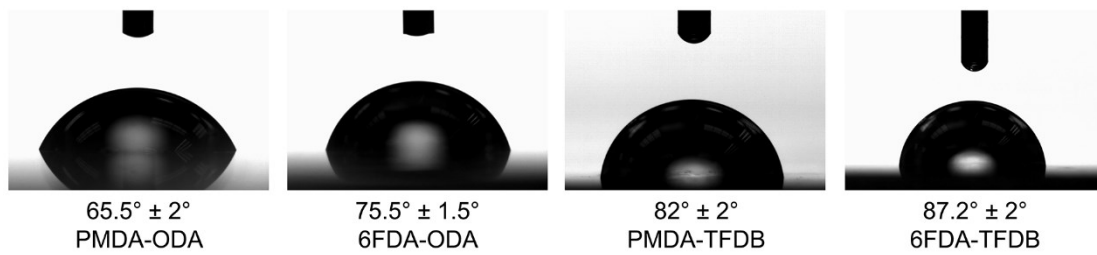

**Figure S3.** The contact angles of the PI films.
